# Supplementary material
Source: PubMed Central journal article supplement (PMC10594540)
Supplement: NIHMS1935910-supplement-Supplemental_Fig_1.pdf [file NIHMS1935910-supplement-Supplemental_Fig_1.pdf]

Supplemental online content for:

## **Impact of Muscle Measures on Outcome in Patients Receiving Endocrine Therapy for Metastatic Breast Cancer: Analysis of ECOG-ACRIN E2112**

Tarah J. Ballinger, MD; Helga S. Marques, MS; Gloria Xue, MS; Richard Hoffman, MS; Constantine Gatsonis, PhD; Fengmin Zhao, PhD; Kathy D. Miller, MD; Joseph Sparano, MD; and Roisin M. Connolly, MD

*J Natl Compr Canc Netw* 2023;21(9):915–923.e1

**eFigure 1:** CONSORT Diagram

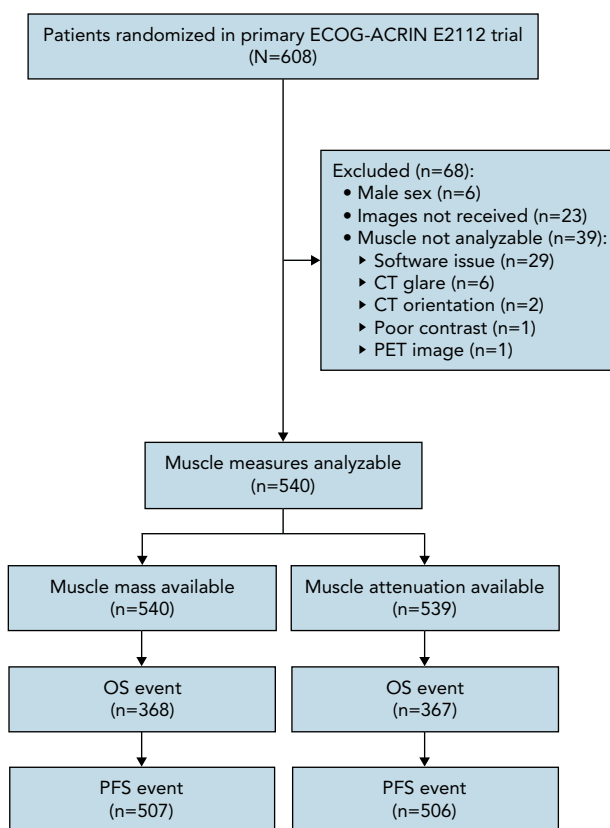

**eFigure 1.** CONSORT diagram.

Abbreviations: OS, overall survival; PFS, progression-free survival.
